# Supplementary material for: Uncertainty and sensitivity analysis of the basic reproduction number of diphtheria: a case study of a Rohingya refugee camp in Bangladesh, November–December 2017
Source: PeerJ. 2018 Apr 2;6:e4583. doi: 10.7717/peerj.4583 (PMC5885970; doi:10.7717/peerj.4583)
Supplement: Supplemental Information 1 — Daily incidence is shown on the second column as a function of the date of illness onset on the first column. [file peerj-06-4583-s001.xlsx]

## Sheet: Sheet1
Date	Cases
2017-11-08	1
2017-11-09	0
2017-11-10	0
2017-11-11	0
2017-11-12	1
2017-11-13	0
2017-11-14	0
2017-11-15	1
2017-11-16	1
2017-11-17	0
2017-11-18	0
2017-11-19	0
2017-11-20	4
2017-11-21	0
2017-11-22	1
2017-11-23	2
2017-11-24	2
2017-11-25	6
2017-11-26	8
2017-11-27	4
2017-11-28	8
2017-11-29	9
2017-11-30	20
2017-12-01	34
2017-12-02	35
2017-12-03	68
2017-12-04	49
2017-12-05	80
2017-12-06	107
2017-12-07	124
2017-12-08	122
2017-12-09	115
2017-12-10	134
2017-12-11	102
2017-12-12	127
2017-12-13	139
2017-12-14	141
2017-12-15	98
2017-12-16	100
2017-12-17	106
2017-12-18	133
2017-12-19	111
2017-12-20	112
2017-12-21	98
2017-12-22	85
2017-12-23	65
2017-12-24	37
2017-12-25	34
2017-12-26	1
2017-12-27	0
